# Supplementary material
Source: MDPI journal article supplement (https://www.mdpi.com/2073-4395/9/1/4)
Supplement: s1 [file s1]

Date: \_\_\_\_\_ Location of agricultural land : Module \_\_\_\_\_  
 Irrigation section \_\_\_\_\_ State : \_\_\_\_\_ Municipality: \_\_\_\_\_

### CONFIDENTIAL

The INFORMATION REQUESTED will have an EXCLUSIVE use for the INVESTIGATION, and the CONFIDENTIALITY of the same one is INSURED. However, you do not have to identify yourself or offer those data that you do not want to disclose. We thank you in advance for your invaluable COLLABORATION.

#### • FARMER' DESCRIPTION

1. Gender: ☐ Male ☐ Female
2. Age \_\_\_\_\_
3. Land tenure regime: Ejidal\* \_\_\_\_\_ Private property \_\_\_\_\_
4. Where does your agricultural training come from?  
☐ Agrarian experience ☐ Agricultural professional-university training ☐ Courses, conferences, workshops, etc.  
☐ Others education sources: \_\_\_\_\_
5. Legal personality  
☐ Individual farmer ☐ Commercial society ☐ Agricultural Association
6. What management regime of your agricultural property do you have?  
☐ I am the owner ☐ I am an owner's family without salary ☐ I'm a salaried family of the owner  
☐ I am a tenant or associate ☐ I am a salaried person
7. Members in the home: \_\_\_\_\_ Members
8. With you, how many generations of your family have been dedicated to agriculture? \_\_\_\_\_ generations
9. In what year was your agricultural property created? \_\_\_\_\_
10. From what year is responsible for this agricultural property? From the year: \_\_\_\_\_
11. Do you belong to an agricultural association?  
☐ Yes ☐ No

#### • FARMS AND MAIN CROP ACTIVITIES (SURFACE AND WATER USE)

12. Of the total income in your home / family, what percentage of it comes from agriculture? \_\_\_\_\_ %.
13. Do you have a credit for farming activity (not exclusively for cultivation)?  
☐ Yes ☐ No
14. What purpose does the credit has?  
☐ To operate \_\_\_\_\_ value in \$  
☐ To invest \_\_\_\_\_ value in \$
15. Do you receive any help, subsidies/s linked to your agricultural activity? ☐ Yes ☐ No (go to question 17)
16. What is the purpose of the aid received?  
☐ To covering operating expenses  
☐ For investment in equipment  
☐ For agricultural improvement of land  
☐ To cover other expenses \_\_\_\_\_
17. Do you currently have any kind of agricultural insurance?  
☐ Yes ☐ No
18. On a scale of 0 to 10 (0 = low quality, 10 = high quality), how do you consider the quality of the soil in your farm?
19. How many soils analyzes do you perform each year on your farm? \_\_\_\_\_ by year?
20. Distribution of the surface of the agricultural land:  
 Total area \_\_\_\_\_ ha.  
 Agricultural Area used \_\_\_\_\_ ha.
21. Do you have problems with water availability in your farm? ☐ Yes ☐ No
22. Do you have experience in water collection systems? (ponds, dams) ☐ Yes ☐ No
23. What type farming system do you use?  
 Irrigation cultivation \_\_\_\_\_ ha.  
 Temporary cultivation \_\_\_\_\_ ha. (go to question 25)
24. What type of irrigation do you use on the farm?  
☐ Irrigation by gravity  
☐ Sprinkler irrigation

- ☐ Mechanized Irrigation by gravity.  
☐ Drip irrigation / localized

25. What is the method of harvesting your crops?

- ☐ Manual  
☐ Mechanic

26. From 0 to 10 indicate which aspects should be improved on your agricultural activity (0 = No required at all, 10 = absolutely required)

- \_\_\_\_\_ The commercialization of my crops  
 \_\_\_\_\_ The fight against diseases or pests  
 \_\_\_\_\_ The choice of crops  
 \_\_\_\_\_ The quality of the soil  
 \_\_\_\_\_ The type of tillage  
 \_\_\_\_\_ The use of efficient irrigation techniques

• AGRICULTURAL PRODUCTION

SURFACE, INCOME AND JOBS GENERATED BY CULTIVATION

| CROPS | Area | Production | Price  | Entry   | Irrigation  | Vol. water           | Numbers of workers |          |           |          |
|-------|------|------------|--------|---------|-------------|----------------------|--------------------|----------|-----------|----------|
|       | (Ha) | (tons/Ha)  | (\$/t) | (\$/Ha) | No/He/Cycle | (m <sup>3</sup> /Ha) | Permanent          |          | Temporary |          |
|       |      |            |        |         |             |                      | Family             | Contract | Family    | Contract |
| 1.    |      |            |        |         |             |                      |                    |          |           |          |
| 2.    |      |            |        |         |             |                      |                    |          |           |          |
| 3.    |      |            |        |         |             |                      |                    |          |           |          |
| 4.    |      |            |        |         |             |                      |                    |          |           |          |
| 5.    |      |            |        |         |             |                      |                    |          |           |          |

• FARMERS' ENVIRONMENTAL ATTITUDES AND OPINIONS (NEP)

27. On a scale of 1 to 9, please indicate your degree of agreement or disagreement with the following statements (write a number between 1 and 9)

| Absolutely disagree<br>1 | Strongly disagree<br>2 | Moderately disagree<br>3 | Slightly disagree<br>4 | Neutral<br>5 | Slightly agree<br>6 | Moderately agree<br>7 | Strongly agree<br>8 | Absolutely agree<br>9 |       |
|--------------------------|------------------------|--------------------------|------------------------|--------------|---------------------|-----------------------|---------------------|-----------------------|-------|
|                          |                        |                          |                        |              |                     |                       |                     |                       | _____ |
|                          |                        |                          |                        |              |                     |                       |                     |                       | _____ |
|                          |                        |                          |                        |              |                     |                       |                     |                       | _____ |
|                          |                        |                          |                        |              |                     |                       |                     |                       | _____ |
|                          |                        |                          |                        |              |                     |                       |                     |                       | _____ |
|                          |                        |                          |                        |              |                     |                       |                     |                       | _____ |
|                          |                        |                          |                        |              |                     |                       |                     |                       | _____ |
|                          |                        |                          |                        |              |                     |                       |                     |                       | _____ |
|                          |                        |                          |                        |              |                     |                       |                     |                       | _____ |
|                          |                        |                          |                        |              |                     |                       |                     |                       | _____ |
|                          |                        |                          |                        |              |                     |                       |                     |                       | _____ |
|                          |                        |                          |                        |              |                     |                       |                     |                       | _____ |
|                          |                        |                          |                        |              |                     |                       |                     |                       | _____ |
|                          |                        |                          |                        |              |                     |                       |                     |                       | _____ |
|                          |                        |                          |                        |              |                     |                       |                     |                       | _____ |
|                          |                        |                          |                        |              |                     |                       |                     |                       | _____ |
|                          |                        |                          |                        |              |                     |                       |                     |                       | _____ |
|                          |                        |                          |                        |              |                     |                       |                     |                       | _____ |

• GLOBAL WARMING AND CLIMATE CHANGE PERCEPTION

28. On a scale of 0 to 10, which of the following practices, are you willing to do to contribute to the reduction of greenhouse gases? (0 = not willing, 10 = completely willing): Choose a number between 0 and 10

- \_\_\_\_\_ Perform only nightly irrigation  
 \_\_\_\_\_ Use low-polluting machinery  
 \_\_\_\_\_ Carry out agro ecological production  
 \_\_\_\_\_ Use renewable energy sources  
 \_\_\_\_\_ Do not burn biomass (stubble)

- \_\_\_\_ Use non-nitrogenous fertilizers  
 \_\_\_\_ Use the zero tillage method

**29. What do you mean by Global Warming? (check only ONE answer)**

- \_\_\_\_ Melting of the poles  
 \_\_\_\_ Rising temperature and warming of the earth  
 \_\_\_\_ Pollution  
 \_\_\_\_ Emission of gases into the atmosphere

**30. What do you mean by Climate Change? (check only ONE answer)**

- \_\_\_\_ Global warming  
 \_\_\_\_ Melting of the poles  
 \_\_\_\_ Station changes  
 \_\_\_\_ Variation in temperature  
 \_\_\_\_ it's colder  
 \_\_\_\_ it's hotter

**31. On a scale of 0 to 10, to what extent do you think that Climate Change is affecting your crops? (0 = has not affected anything, 10 = has affected a lot): Choose a number between 1 and 10 \_\_\_\_\_**

**32. On a scale of 0 to 10, to what extent do you think Global Warming is affecting your crops? (0 = has not affected anything, 10 = has affected a lot): Choose a number between 1 and 10 \_\_\_\_\_**

**33. Has climate change influenced your production costs?**

- ☐ No ☐ Yes ¿In what percentage? \_\_\_\_\_

**34. Indicate your degree of agreement or disagreement with the following statements (write a number between 1 and 9)**

| Absolutely disagree | Strongly disagree                                                                      | Moderately disagree | Slightly disagree | Neutral | Slightly agree | Moderately agree | Strongly agree | Absolutely agree |
|---------------------|----------------------------------------------------------------------------------------|---------------------|-------------------|---------|----------------|------------------|----------------|------------------|
| 1                   | 2                                                                                      | 3                   | 4                 | 5       | 6              | 7                | 8              | 9                |
| 1.                  | In the last 10 years you have noticed that the temperature has increased               |                     |                   |         |                |                  |                |                  |
| 2.                  | In the last 10 years you have noticed that the level of precipitation has changed      |                     |                   |         |                |                  |                |                  |
| 3.                  | In the last 10 years you have noticed that rain periods have changed their temporality |                     |                   |         |                |                  |                |                  |
| 4.                  | In the last 10 years you have noticed that the soil has lost fertility                 |                     |                   |         |                |                  |                |                  |
| 5.                  | In the last 10 years you have noticed that the periods of drought have increased       |                     |                   |         |                |                  |                |                  |
| 6.                  | In the last 10 years you have noticed that the harvest has decreased                   |                     |                   |         |                |                  |                |                  |
| 7.                  | In the last 10 years you have noticed that there have been more episodes of droughts   |                     |                   |         |                |                  |                |                  |
| 8.                  | In the last 10 years you have noticed that there have been more episodes of frost      |                     |                   |         |                |                  |                |                  |
| 9.                  | In the last 10 years you have noticed that there have been more episodes of floods     |                     |                   |         |                |                  |                |                  |
| 10.                 | In the last 10 years you have noticed that there have been more episodes of Hail       |                     |                   |         |                |                  |                |                  |
| 11.                 | In the last 10 years you have noticed that there have been more diseases and pests     |                     |                   |         |                |                  |                |                  |
| 12.                 | In the last 10 years you have noticed that you have observed vegetation changes:       |                     |                   |         |                |                  |                |                  |

**• FARMERS' RISK ATTITUDES**

**35. Next, I am going to ask you to participate in a Simple "Hypothetical" Lottery Game in which you can earn some money. The question is based on whether you prefer to earn a small amount of money safely or earn a greater amount of money where there is some risk that you do not win anything.**

**Question 1: What alternative do you choose? (Check the corresponding option)**

- ☐ Option A: You get \$100 safely.  
☐ Option B: We flip a coin: if the coin comes out **HEAD**, you get \$100, if **TAIL** comes out, you get nothing.

**Question 2: What alternative do you choose? (Check the corresponding option)**

- ☐ Option A: You get \$75 safely.  
☐ Option B: We flip a coin: if the coin comes out **HEAD**, you get \$100, if **TAIL** comes out, you get nothing.

**Question 3: What alternative do you choose? (Check the corresponding option)**

- ☐ Option A: You get \$60 safely.  
☐ Option B: We flip a coin: if the coin comes out **HEAD**, you get \$100, if **TAIL** comes out, you get nothing.

**Question 4: What alternative do you choose? (Check the corresponding option)**

- ☐ Option A: You get \$50 safely.  
☐ Option B: We flip a coin: if the coin comes out **HEAD**, you get \$100, if **TAIL** comes out, you get nothing.

**Question 5: What alternative do you choose? (Check the corresponding option)**

- ☐ Option A: You get \$40 safely.  
☐ Option B: We flip a coin: if the coin comes out **HEAD**, you get \$100, if **TAIL** comes out, you get nothing.

**Question 6: What alternative do you choose? (Check the corresponding option)**

- ☐ Option A: You get \$30 safely.
- ☐ Option B: We flip a coin: if the coin comes out **HEAD**, you get \$100, if **TAIL** comes out, you get nothing.

**Question 7: What alternative do you choose? (Check the corresponding option)**

- ☐ Option A: You get \$20 safely.
- ☐ Option B: We flip a coin: if the coin comes out **HEAD**, you get \$100, if **TAIL** comes out, you get nothing.

**Question 8: What alternative do you choose? (Check the corresponding option)**

- ☐ Option A: You get \$10 safely.
  - ☐ Option B: We flip a coin: if the coin comes out **HEAD**, you get \$100, if **TAIL** comes out, you get nothing.
-
